# Supplementary material for: Effect of solvent polarity on the Ultrasound Assisted extraction and antioxidant activity of phenolic compounds from habanero pepper leaves (Capsicum chinense) and its identification by UPLC-PDA-ESI-MS/MS
Source: PubMed Central journal article supplement — Ultrason Sonochem. 2021 Jul 2;76:105658. doi: 10.1016/j.ultsonch.2021.105658 (PMC8273200; doi:10.1016/j.ultsonch.2021.105658), 2021-07-02

## Supplementary Material

### **Effect of solvent polarity on the Ultrasound Assisted Extraction and antioxidant activity of phenolic compounds from habanero pepper leaves (*Capsicum chinense*) and its identification by UPLC-PDA-ESI-MS/MS**

Emanuel Herrera-Pool<sup>1</sup>, Ana Luisa Ramos-Díaz<sup>1</sup>, Manuel Alejandro Lizardi-Jiménez<sup>2</sup>, Soledad Pech-Cohuo<sup>1</sup>, Teresa Ayora-Talavera<sup>1</sup>, Juan C. Cuevas-Bernardino<sup>3</sup>, Ulises García-Cruz<sup>4</sup> Neith Pacheco<sup>1\*</sup>

<sup>1</sup>Centro de Investigación y Asistencia en Tecnología y Diseño del Estado de Jalisco (CIATEJ) Unidad Sureste. Tablaje Catastral 31264 Km 5.5 Carretera Sierra Papacal-Chuburná Puerto. Parque Científico Tecnológico de Yucatán CP. 97302.

<sup>2</sup>CONACyT-Universidad Autónoma de San Luis Potosí, San Luis Potosí. México. C. P. 78210.

<sup>3</sup>CONACYT-Centro de Investigación y Asistencia en Tecnología y Diseño del Estado de Jalisco (CIATEJ) Unidad Sureste. Tablaje Catastral 31264 Km 5.5 Carretera Sierra Papacal-Chuburná Puerto. Parque Científico Tecnológico de Yucatán CP. 97302.

<sup>4</sup>Centro de Investigación y Estudios Avanzados del Instituto Politécnico Nacional (CINVESTAV-Mérida). Departamento de Recursos del Mar, Mérida, México.

\*Corresponding autor at: Laboratory of Traceability and Food Safety, Centro de Investigación y Asistencia en Tecnología y Diseño del Estado de Jalisco (CIATEJ), Unidad Sureste. Yucatán, México.

E-mail address: [npacheco@ciatej.mx](mailto:npacheco@ciatej.mx)

# Table S1

**Table 1.** Experimental design for the evaluation of the effect of method and solvent on the total phenolic content (TPC) and antioxidant activity of habanero pepper (*C. chinense*) leaves extracts.

| Treatment | Factor Levels        |            | Responses (Y <sub>1</sub> , Y <sub>2</sub> , Y <sub>3</sub> ) |
|-----------|----------------------|------------|---------------------------------------------------------------|
|           | A: Extraction Method | B: Solvent |                                                               |
| 1         | CE                   | W          | <b>Content of Phenolic Compounds</b>                          |
| 2         | CE                   | 1% AcOH    |                                                               |
| 3         | CE                   | 20% MeOH   |                                                               |
| 4         | CE                   | 50% MeOH   |                                                               |
| 5         | CE                   | 80% MeOH   |                                                               |
| 6         | CE                   | 80% Ace    |                                                               |
| 7         | CE                   | MeOH       |                                                               |
| 8         | CE                   | Ace        |                                                               |
| 9         | CE                   | AcOEt      |                                                               |
| 10        | CE                   | Hx         |                                                               |
| 11        | UAE                  | W          |                                                               |
| 12        | UAE                  | 1% AcOH    |                                                               |
| 13        | UAE                  | 20% MeOH   |                                                               |
| 14        | UAE                  | 50% MeOH   |                                                               |
| 15        | UAE                  | 80% MeOH   |                                                               |
| 16        | UAE                  | 80% Ace    |                                                               |
| 17        | UAE                  | MeOH       |                                                               |
| 18        | UAE                  | Ace        |                                                               |
| 19        | UAE                  | AcOEt      |                                                               |
| 20        | UAE                  | Hx         |                                                               |

**CE:** Conventional Extraction; **UAE:** Ultrasound-Assisted Extraction; **W:** water; **1% AcOH:** 1% acetic acid; **20% MeOH:** 20% methanol; **80% MeOH:** 80% methanol; **80% Ace:** 80% acetone; **MeOH:** methanol; **Ace:** acetone; **AcOEt:** ethyl acetate; **Hx:** hexane.

**Figure S1**

**Conventional extraction (CE) representation**

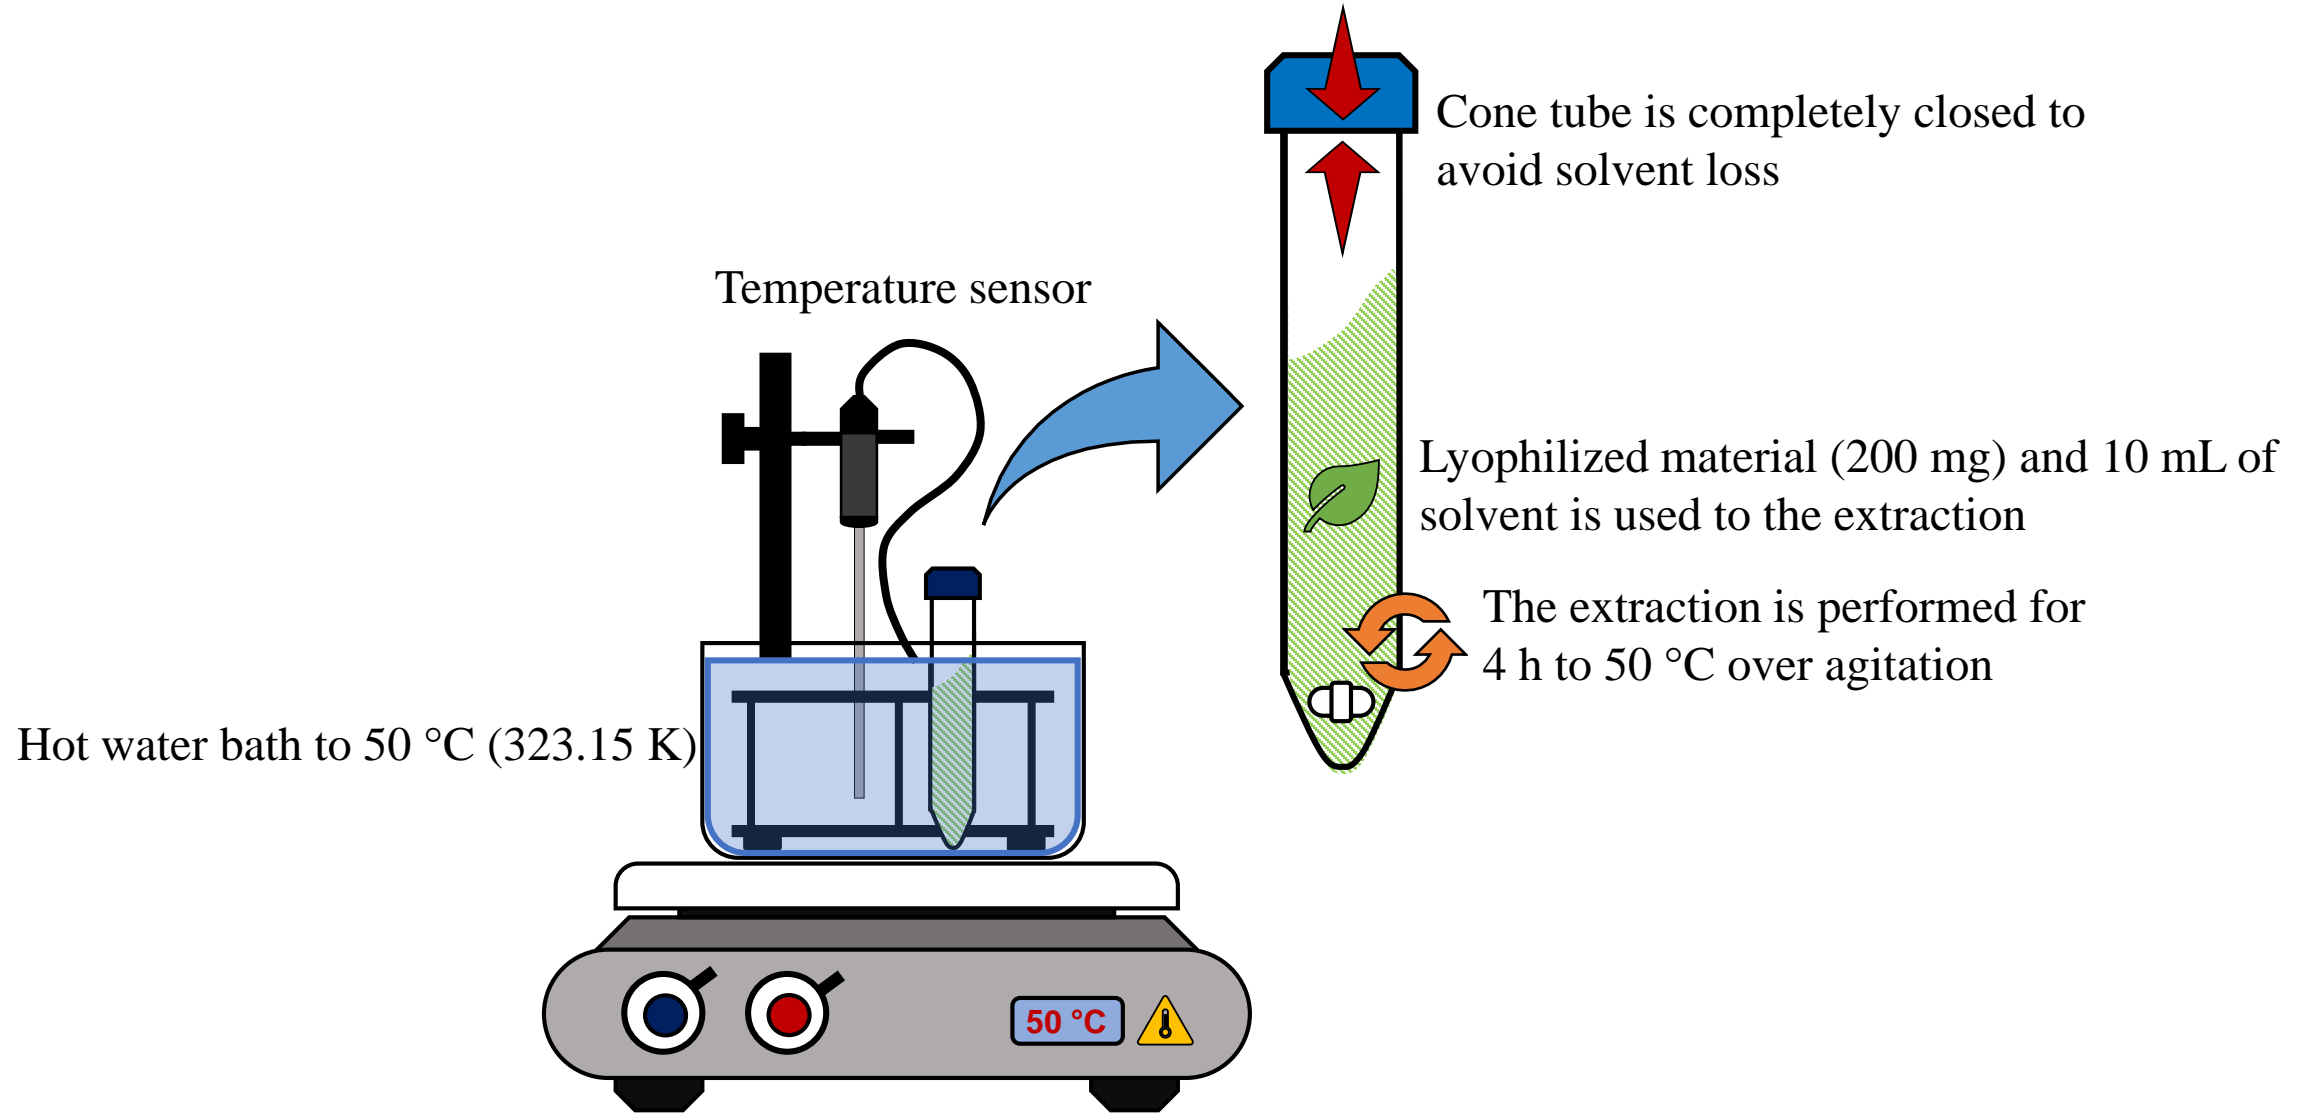

**Figure S2**

**Ultrasound assisted extraction (UAE) representation**

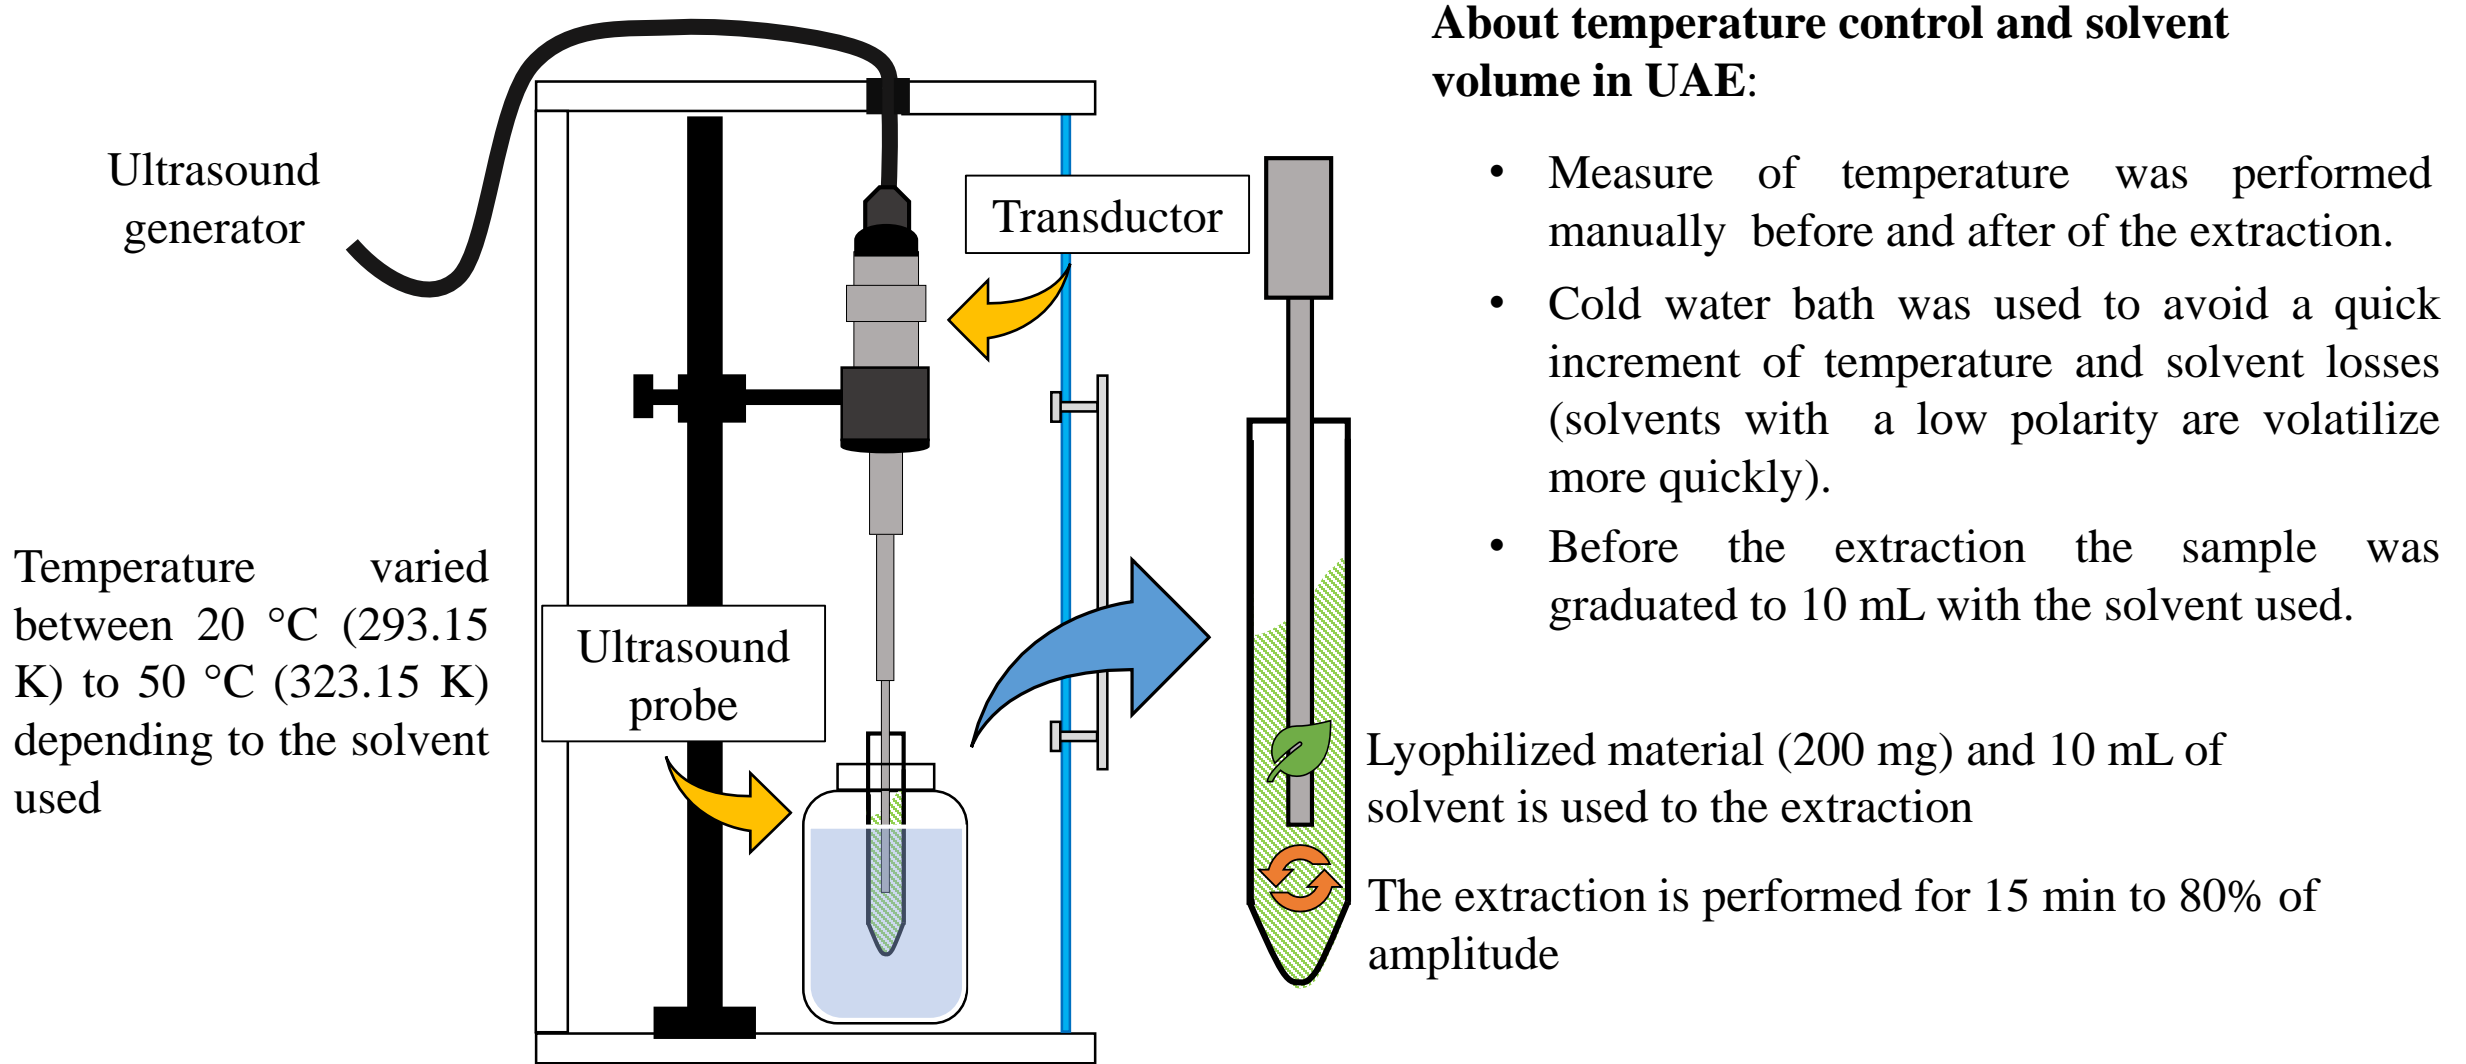

**About temperature control and solvent volume in UAE:**

- Measure of temperature was performed manually before and after of the extraction.
- Cold water bath was used to avoid a quick increment of temperature and solvent losses (solvents with a low polarity are volatilize more quickly).
- Before the extraction the sample was graduated to 10 mL with the solvent used.

Cavitations produced the rupture of cell wall and release phenolic compounds. That allow the solvation of phenolics in solvent used

**Figure S3**

**Method used to obtain hydrolyzed extract**

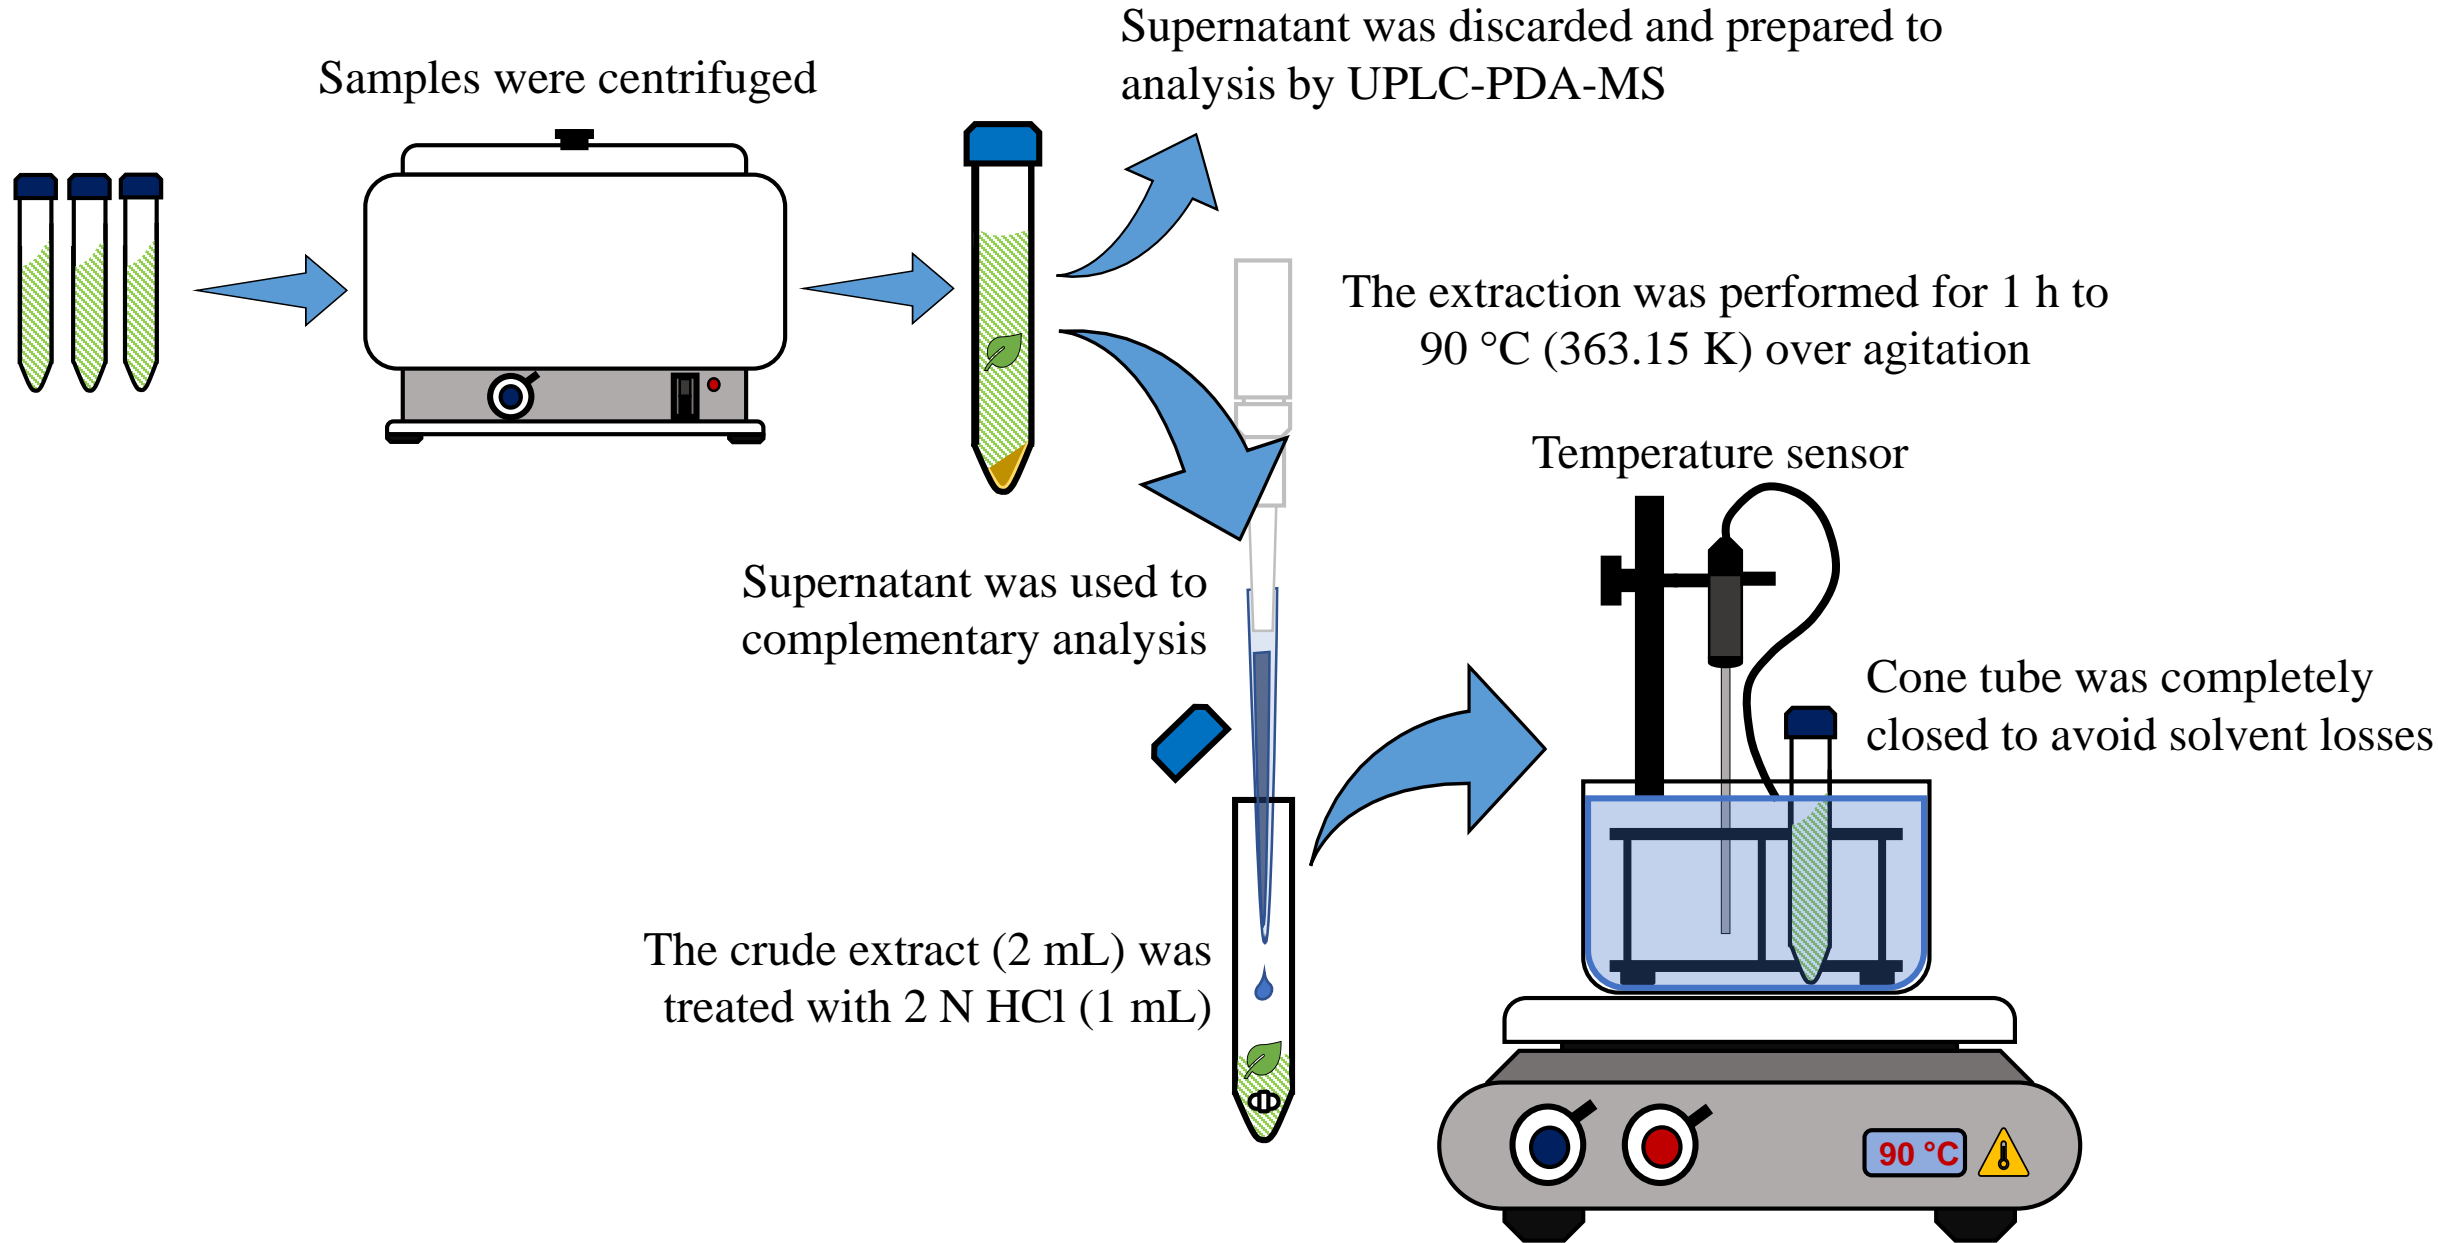

Supplement: mmc1.pdf [file mmc1.pdf]
